# Supplementary material for: Risk of malignant lymphomas in patients with inflammatory bowel disease: a population-based cohort study
Source: PubMed Central journal article supplement (PMC10163486; doi:10.1136/bmjgast-2022-001037), 2023-05-04
Supplement: bmjgast-2022-001037supp001.pdf [file bmjgast-2022-001037supp001.pdf]

## Risk of malignant lymphomas in patients with inflammatory bowel disease: A population-based cohort study

### Supplementary Appendix

#### Investigators:

Jingru Yu, Erle Refsum, Paulina Wieszczy, Lise M. Helsingen, Vera Perrin, Amanda Högdén, Magnus Løberg, Johannes Blom, Michael Bretthauer, Hans-Olov Adami, Weimin Ye, Mette Kalager.

### Table of Contents

|                                                                                                                                                                                                 |    |
|-------------------------------------------------------------------------------------------------------------------------------------------------------------------------------------------------|----|
| Fig. S1. Overview of cohort members included in analysis. ....                                                                                                                                  | 2  |
| Fig. S2. Design diagram of analyses on pharmacotherapy in the Swedish cohort. ....                                                                                                              | 3  |
| Table S1. ICD codes used to define patients with inflammatory bowel disease (IBD) from national patient registry and hospital databases. ....                                                   | 4  |
| Table S2. Definitions and diagnostic codes used to define ulcerative colitis (UC) and Crohn's disease (CD) according to the Montreal classification. ....                                       | 5  |
| Table S3: Definition of IBD-related bowel surgeries in Norway and Sweden. <sup>1</sup> .....                                                                                                    | 7  |
| Table S4: Definition of biologic drugs and thiopurines according to Anatomical Therapeutic Chemical (ATC) codes in the Swedish Prescribed Drug Register. ....                                   | 8  |
| Table S5: Definition of cancer outcomes in Norway and Sweden. <sup>2,3</sup> .....                                                                                                              | 9  |
| Table S6: Number of cases, standardized incidence ratio, and crude incidence rates per 100,000 person-years for non-Hodgkin lymphoma, Norway and Sweden. ....                                   | 10 |
| Table S7: Number of cases, standardized incidence ratio, and crude incidence rates per 100,000 person-years for Hodgkin lymphoma, Norway and Sweden. ....                                       | 12 |
| Table S8: Number of cases, standardized incidence ratio, and crude incidence rates per 100,000 person-years for non-Hodgkin lymphoma, Norway and Sweden, first year of follow-up included. .... | 14 |
| Table S9: Number of cases, standardized incidence ratio, and crude incidence rates per 100,000 person-years for Hodgkin lymphoma, Norway and Sweden, first year of follow-up included. ....     | 16 |
| References .....                                                                                                                                                                                | 18 |

**Fig. S1. Overview of cohort members included in analysis.**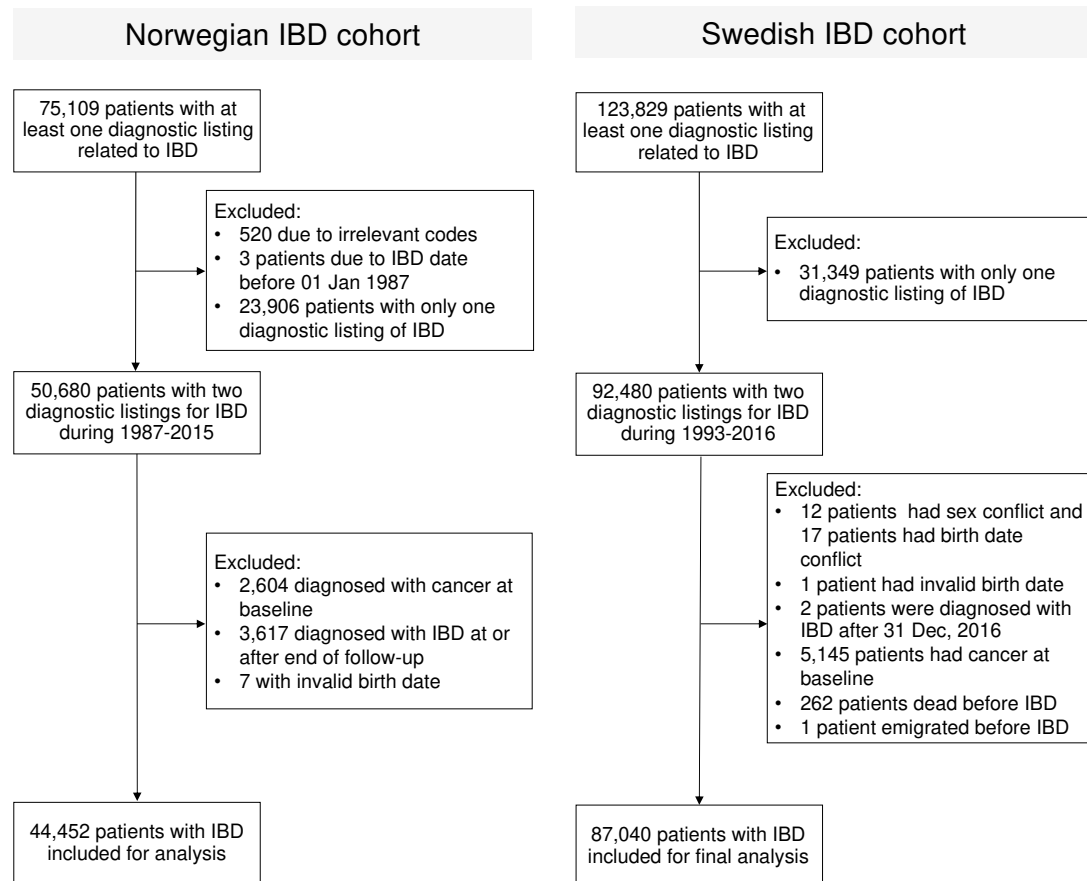

**Fig. S2. Design diagram of analyses on pharmacotherapy in the Swedish cohort.**

Diagram inspired by the work of Schneeweiss et al.,<sup>1</sup> made using template available at <https://presc.sdu.dk/repeat-diagrams/>

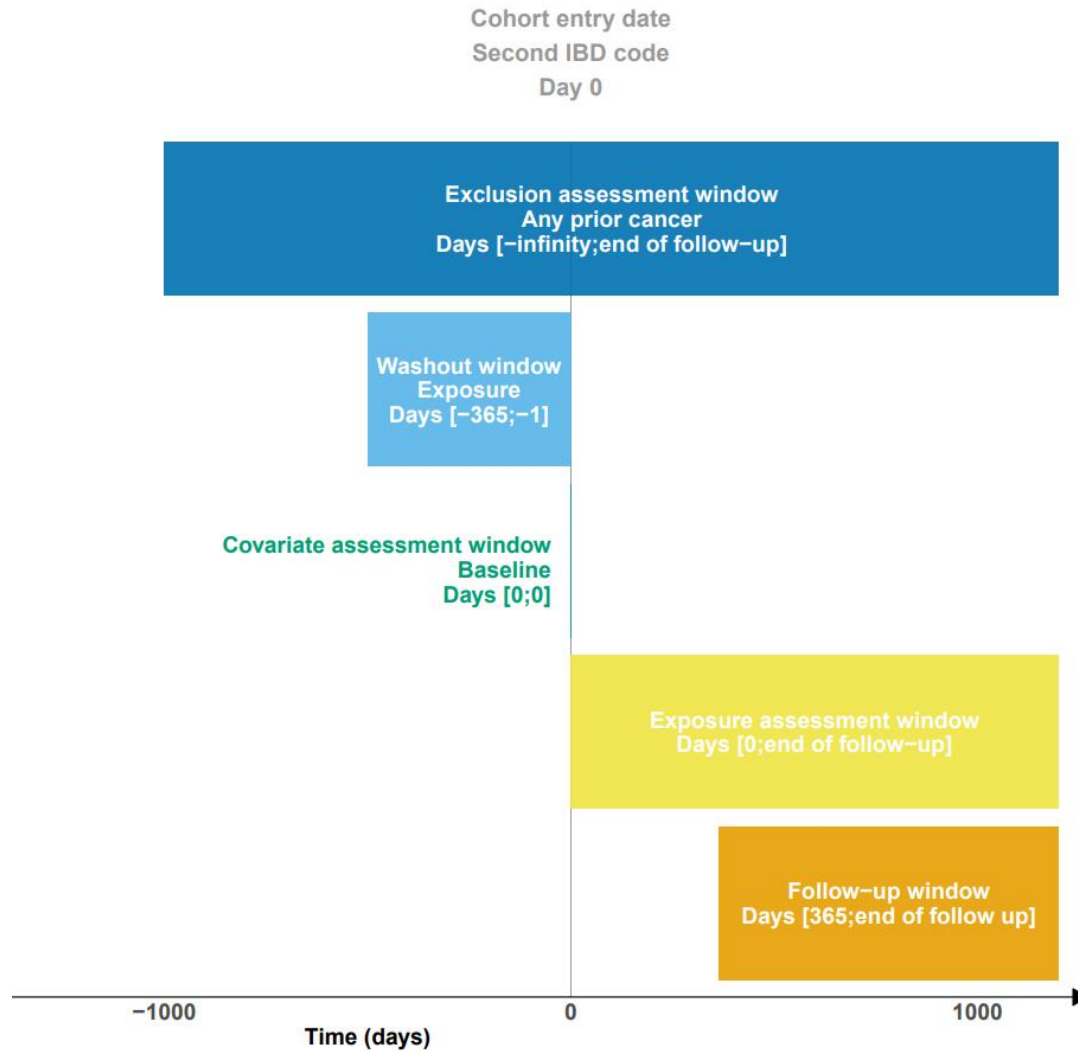

**Table S1. ICD codes used to define patients with inflammatory bowel disease (IBD) from national patient registry and hospital databases.**

| <b>IBD subtype</b>      | <b>ICD-9</b> | <b>ICD-10</b> |
|-------------------------|--------------|---------------|
| Ulcerative colitis (UC) | 556          | K51           |
| Crohn's disease (CD)    | 555          | K50           |
| Unclassified (IBD-U)    | UC+CD        | UC+CD or K523 |

Classification of IBD subtypes is based on the two first diagnostic codes:

Ulcerative colitis, 1st code UC, 2nd code UC;

Crohn's disease, 1st code CD, 2nd code CD;

Unclassified, 1st code IBD-U, 2nd code IBD-U, or any combination of codes for UC, CD, and IBD-U.

ICD-9 was implemented in Sweden in 1987, and in Norway in 1986. ICD-10 was implemented in Sweden 1997, and in Norway in 1999.

**Table S2. Definitions and diagnostic codes used to define ulcerative colitis (UC) and Crohn's disease (CD) according to the Montreal classification.**

| Ulcerative colitis | Extent                                  | Diagnostic codes                                                                                                                                                                                                                                          |                                                                                                                                                                                                                                                             |
|--------------------|-----------------------------------------|-----------------------------------------------------------------------------------------------------------------------------------------------------------------------------------------------------------------------------------------------------------|-------------------------------------------------------------------------------------------------------------------------------------------------------------------------------------------------------------------------------------------------------------|
|                    |                                         | Norway                                                                                                                                                                                                                                                    | Sweden                                                                                                                                                                                                                                                      |
| E1                 | Ulcerative proctitis                    | ICD-10=K512;<br>ICD-9=5561                                                                                                                                                                                                                                | ICD-10=K512                                                                                                                                                                                                                                                 |
| E2                 | Left-sided UC                           | ICD-10=K513, K515;<br>ICD-9=5565                                                                                                                                                                                                                          | ICD-10=K513, K515                                                                                                                                                                                                                                           |
| E3                 | Extensive UC                            | ICD-10=K510, K511;<br>ICD-9=5562                                                                                                                                                                                                                          | ICD-10=K510, K511                                                                                                                                                                                                                                           |
| Ex                 | Extent not defined                      | ICD-10=K51, K514, K518,<br>K519;<br>ICD-9=5560, 55606, 5564,<br>5569                                                                                                                                                                                      | ICD-10=K514, K518, K519                                                                                                                                                                                                                                     |
| Crohn's disease    | Location                                | Diagnostic codes                                                                                                                                                                                                                                          |                                                                                                                                                                                                                                                             |
|                    |                                         | Norway                                                                                                                                                                                                                                                    | Sweden                                                                                                                                                                                                                                                      |
| L1                 | Small bowel disease or terminal ileitis | ICD-10=K500;<br>ICD-9=5550                                                                                                                                                                                                                                | ICD-10=K500;<br>ICD-9=555A                                                                                                                                                                                                                                  |
| L2                 | Colon                                   | ICD-10=K501;<br>ICD-9=5551, 55506                                                                                                                                                                                                                         | ICD-10=K501;<br>ICD-9=555B                                                                                                                                                                                                                                  |
| L3                 | Ileocecal Crohn's disease               | ICD-10=K508;<br>ICD-9=5552                                                                                                                                                                                                                                | ICD-10=K508;<br>ICD-9=555C, 555AB                                                                                                                                                                                                                           |
| Lx                 | Location not defined                    | ICD-10=K509;<br>ICD-9=555, 5559, 55502,<br>56301                                                                                                                                                                                                          | ICD-10=K509;<br>ICD-9=555X, 555                                                                                                                                                                                                                             |
| Crohn's disease    | Behaviour                               | Diagnostic codes                                                                                                                                                                                                                                          |                                                                                                                                                                                                                                                             |
|                    |                                         | Norway                                                                                                                                                                                                                                                    | Sweden                                                                                                                                                                                                                                                      |
| B1                 | Non-stricturing, non-penetrating        | None of the ICD-codes for B2 or B3                                                                                                                                                                                                                        | None of the ICD-codes for B2 or B3                                                                                                                                                                                                                          |
| B2                 | Stricturing                             | Crohn's disease AND any of the following codes: ICD-10=K565, K566, K567, K624; ICD-9=5608, 5609                                                                                                                                                           | Crohn's disease AND any of the following codes: IC10=K565, K566, K567, K624; ICD-9=560W, 560X                                                                                                                                                               |
| B3                 | Penetrating                             | Crohn's disease AND any of the following diagnostic codes: ICD-10=K630, K632, K316, N823, N824; ICD-9=5374, 5696, 5961, 6191, 6298, OR any of the following surgical procedure codes (JHD20, JHD30, JHD33, JHD50, JHD60, JHD63, JFA76, JFA86, 4603, 4962) | Crohn's disease AND any of the following diagnostic codes: IC10=K630, K632, K316, N823, N824; ICD-9=569F, 537E, 596B, 619B, OR any of the following surgical procedure codes (JHD20, JHD30, JHD33, JHD50, JHD60, JHD63, JFA76, JFA86, no 4603 or 2#GH 4962) |
| B2B3               | Stricturing and penetrating             | Both of the ICD codes for B2 and B3                                                                                                                                                                                                                       | Both of the ICD codes for B2 and B3                                                                                                                                                                                                                         |
| P                  | Perianal disease modifier               | Crohn's disease AND any of the following diagnostic codes: K603, K604, K605, K610, K611, K612, K613, K614, K624; ICD-9=565, 5650, 5651, OR any of the following surgical procedure codes: (JHD20, JHD30, JHD33, JHD50, JHD60, JHD63, JHA00, JHA20, JHW96) | Crohn's disease AND any of the following diagnostic codes: K603, K604, K605, K610, K611, K612, K613, K614, K624; ICD-9=565B, 566, 569C, OR any of the following surgical procedure codes: (JHD20, JHD30, JHD33, JHD50, JHD60, JHD63, JHA00, JHA20, JHW96)   |

ICD-9 was implemented in Sweden in 1987, and in Norway in 1986. Swedish ICD-9 codes do not discriminate between different levels of extent of ulcerative colitis. ICD-10 was implemented in Sweden 1997, and in

Norway in 1999. All codes were captured in the Swedish National Patient Register and Norwegian hospital databases.

**Table S3: Definition of IBD-related bowel surgeries in Norway and Sweden.<sup>2</sup>**

|                       | Norway                    |                                                        | Sweden                                    |                                            |
|-----------------------|---------------------------|--------------------------------------------------------|-------------------------------------------|--------------------------------------------|
|                       | SIFF codes<br>(1980-1998) | NCSP-N codes<br>(1999- present)                        | 5/6 <sup>th</sup> revision<br>(1963-1996) | 7 <sup>th</sup> revision<br>(1997-present) |
| Small bowel resection | 4620, 4621, 4722, 4672    | JFB00, JFB01, JFC00, JFC01, JFA60                      | 4630, 4631                                | JFB00-01                                   |
| Colon resection       | 464, 4723, 4673           | JFB4, JFB50, JFB51, JFB6                               | 464, 4713                                 | JFB2-JFB6                                  |
| Rectum resection      | 482                       | JGB                                                    | 482                                       | JGB                                        |
| Other or combinations | 4724                      | JFB20, JFB21, JFB33, JFB34, JFB53, JFB54, JFB96, JFB97 |                                           |                                            |
| Total colectomy       | 465                       | JFH                                                    | 465                                       | JFH                                        |

SIFF: Statens Institutt for Folkehelse; Norwegian Institute of Public Health classification of surgeries.

NCSP: Nordic Medico-Statistical Committee (NOMESCO) Classification of Surgical Procedures. NCSP was introduced in Norway in 1999, and in Sweden in 1997.

**Table S4: Definition of biologic drugs and thiopurines according to Anatomical Therapeutic Chemical (ATC) codes in the Swedish Prescribed Drug Register.**

| <b>Medication</b>                           | <b>ATC code</b>     |
|---------------------------------------------|---------------------|
| Thiopurines (mixed with Allopurinol or not) |                     |
| Azathioprine                                | L04AX01             |
| Mercaptopurine                              | L01BB02             |
| Anti-TNF agents                             |                     |
| Etanercept                                  | L04AB01             |
| Infliximab                                  | L04AA12,<br>L04AB02 |
| Adalimumab                                  | L04AB04             |
| Certolizumab pegol                          | L04AB05             |
| Golimumab                                   | L04AB06             |



**Table S5: Definition of cancer outcomes in Norway and Sweden.**<sup>3,4</sup>**Table S5A:** Outcome definitions in Norwegian data, using ICD-10 and ICD-O-3 codes.

| Outcome                | ICD-10                | ICD-O-3 topography | ICD-O-3 morphology                                                      |
|------------------------|-----------------------|--------------------|-------------------------------------------------------------------------|
| Hodgkin's lymphoma     | C81                   | C77                | 965-966                                                                 |
| Non-Hodgkin's lymphoma |                       |                    |                                                                         |
|                        | B-cell C82, C83, C85: | C77                | 967-969, 9728, 973,<br>9761-9767, 9769, 9823,<br>9826, 9833, 9836, 9940 |
|                        | CLL* C91.1            | C421               | 9823                                                                    |
|                        | T/NK-cell C84, C86    | C77                | 970, 971, 9729, 9827,<br>9831, 9834, 9837, 9948                         |

\*C91.1. CLL, leukemic presentation, morphology code 9823; C42.1. CLL, lymphoma presentation, morphology code 9823.

**Table S5B.** ICD-O-2 and SNOMED codes for leukemia and lymphomas in Sweden.

| Outcome                      | ICD-O2  | SNOMED                               |
|------------------------------|---------|--------------------------------------|
| Non-Hodgkin's lymphoma (NHL) | C82-C85 | Any code starting with 95, 96, 97,98 |
| Hodgkin's lymphoma (HL)      | C81     | Any code starting with 95, 96, 97,98 |
| Chronic lymphocytic leukemia | C91.1   | Any code starting with C98           |

**Table S6: Number of cases, standardized incidence ratio, and crude incidence rates per 100,000 person-years for non-Hodgkin lymphoma, Norway and Sweden.**

| Parameters                                       | Norway 1987-2015     |         |                   | Sweden 1993-2016     |           |                  |
|--------------------------------------------------|----------------------|---------|-------------------|----------------------|-----------|------------------|
|                                                  | IR (95% CI)          | O/E     | SIR (95% CI)      | IR (95% CI)          | O/E       | SIR (95% CI)     |
| Total                                            | 20,4 (16,6 to 25,1)  | 90/69,1 | 1,3 (1,1 to 1,6)  | 36,9 (32,8 to 41,5)  | 279/208,7 | 1,3 (1,2 to 1,5) |
| Sex                                              |                      |         |                   |                      |           |                  |
| Female                                           | 16,8 (12,1 to 23,3)  | 36/27   | 1,3 (1,0 to 1,8)  | 29,4 (24,4 to 35,5)  | 109/82,4  | 1,3 (1,1 to 1,6) |
| Male                                             | 23,8 (18,3 to 31,1)  | 54/42,1 | 1,3 (1,0 to 1,7)  | 44,1 (37,9 to 51,3)  | 170/126,3 | 1,3 (1,2 to 1,6) |
| Age at IBD diagnosis                             |                      |         |                   |                      |           |                  |
| <20                                              | 1,9 (0,3 to 13,6)    | 1/0,6   | 1,8 (0,3 to 12,9) | 8,5 (4,0 to 17,8)    | 7/1,5     | 4,6 (2,2 to 9,7) |
| 20-39                                            | 6,5 (3,7 to 11,1)    | 13/10,3 | 1,3 (0,7 to 2,2)  | 12,2 (8,8 to 17)     | 35/18,4   | 1,9 (1,4 to 2,6) |
| 40-59                                            | 32,8 (24,4 to 44,1)  | 44/32,6 | 1,3 (1,0 to 1,8)  | 42,7 (35,7 to 51,2)  | 117/90,2  | 1,3 (1,1 to 1,6) |
| 60+                                              | 60,8 (43 to 85,9)    | 32/25,7 | 1,2 (0,9 to 1,8)  | 107 (89,5 to 127,9)  | 120/98,5  | 1,2 (1,0 to 1,5) |
| Calendar year of IBD diagnosis <sup>a</sup>      |                      |         |                   |                      |           |                  |
| 1987/93-2002                                     | 19,3 (15,1 to 24,7)  | 63/51,4 | 1,2 (1,0 to 1,6)  | 40,4 (35,2 to 46,3)  | 205/147   | 1,4 (1,2 to 1,6) |
| 2003-2015/6                                      | 23,7 (16,3 to 34,6)  | 27/17,8 | 1,5 (1,0 to 2,2)  | 29,8 (23,7 to 37,4)  | 74/61,7   | 1,2 (1,0 to 1,5) |
| IBD subtype                                      |                      |         |                   |                      |           |                  |
| Ulcerative colitis                               | 14,8 (9,6 to 23,0)   | 20/15,7 | 1,3 (0,8 to 2,0)  | 36,9 (30,2 to 45)    | 97/67,3   | 1,4 (1,2 to 1,8) |
| Crohn's disease                                  | 23 (18 to 29,4)      | 63/48,6 | 1,3 (1,0 to 1,7)  | 37,7 (32,4 to 43,9)  | 168/129,5 | 1,3 (1,1 to 1,5) |
| IBD-unclassified                                 | 22,2 (10,6 to 46,5)  | 7/4,8   | 1,5 (0,7 to 3,1)  | 29,9 (17,7 to 50,4)  | 14/11,9   | 1,2 (0,7 to 2,0) |
| Extent of ulcerative colitis <sup>b</sup>        |                      |         |                   |                      |           |                  |
| E1 (proctitis)                                   | 25,6 (16,1 to 40,7)  | 18/13,3 | 1,3 (0,9 to 2,1)  | 38,5 (23,6 to 62,9)  | 16/10,8   | 1,5 (0,9 to 2,4) |
| E2 (left-sided)                                  | 26,8 (11,2 to 64,4)  | 5/3,7   | 1,3 (0,6 to 3,2)  | 35,9 (25,1 to 51,4)  | 30/26,2   | 1,1 (0,8 to 1,6) |
| E3 (extensive)                                   | 21,7 (15,4 to 30,6)  | 33/24,4 | 1,4 (1,0 to 1,9)  | 34,8 (28,2 to 43)    | 86/65,5   | 1,3 (1,1 to 1,6) |
| Ex (not defined)                                 | 21 (10,0 to 44,1)    | 7/7,1   | 1 (0,5 to 2,1)    | 49 (35,3 to 67,9)    | 36/27     | 1,3 (1,0 to 1,8) |
| Location of Crohn's disease <sup>b</sup>         |                      |         |                   |                      |           |                  |
| L1 (terminal ileitis)                            | 33,9 (16,9 to 67,8)  | 8/3,1   | 2,6 (1,3 to 5,1)  | 44,3 (28,3 to 69,5)  | 19/13,2   | 1,4 (0,9 to 2,2) |
| L2 (colonic)                                     | 16,4 (6,8 to 39,3)   | 5/4,2   | 1,2 (0,5 to 2,8)  | 38,9 (24,8 to 61)    | 19/13,1   | 1,5 (0,9 to 2,3) |
| L3 (ileocecal)                                   | 9,1 (4,1 to 20,4)    | 6/6,1   | 1 (0,4 to 2,2)    | 29,9 (22,1 to 40,4)  | 42/31,7   | 1,3 (1,0 to 1,8) |
| Lx (not defined)                                 | 6,5 (0,9 to 46,5)    | 1/2,3   | 0,4 (0,1 to 3,1)  | 55,1 (34,2 to 88,6)  | 17/9,3    | 1,8 (1,1 to 2,9) |
| Behavior of Crohn's disease <sup>b</sup>         |                      |         |                   |                      |           |                  |
| B1 (non structuring / penetrating)               | 16,6 (10,2 to 27,1)  | 16/11,4 | 1,4 (0,9 to 2,3)  | 30,8 (23,7 to 40)    | 56/44,4   | 1,3 (1,0 to 1,6) |
| B2 (stricturing)                                 | 9,3 (2,3 to 37,3)    | 2/3     | 0,7 (0,2 to 2,7)  | 60 (43,1 to 83,6)    | 35/18,2   | 1,9 (1,4 to 2,7) |
| B3 (penetrating)                                 | -                    | 0/0,8   | -                 | 45,7 (19,0 to 109,9) | 5/2,0     | 2,5 (1,0 to 5,9) |
| B2B3 (stricturing and penetrating)               | 31,5 (7,9 to 126,1)  | 2/0,6   | 3,5 (0,9 to 14,1) | 8,4 (1,2 to 59,8)    | 1/2,6     | 0,4 (0,1 to 2,7) |
| Perianal disease of Crohn's disease <sup>b</sup> |                      |         |                   |                      |           |                  |
| No                                               | 15,4 (9,6 to 24,8)   | 17/13,7 | 1,2 (0,8 to 2,0)  | 30,3 (23,6 to 39,1)  | 60/52,7   | 1,1 (0,9 to 1,5) |
| Yes                                              | 12,2 (3,9 to 37,8)   | 3/2     | 1,5 (0,5 to 4,7)  | 56,6 (41,0 to 78,1)  | 37/14,7   | 2,5 (1,8 to 3,5) |
| Years since IBD diagnosis                        |                      |         |                   |                      |           |                  |
| >1 - 2                                           | 25,1 (13,5 to 46,6)  | 10/4,7  | 2,1 (1,1 to 3,9)  | 34,3 (23,5 to 49,9)  | 27/17,7   | 1,5 (1,0 to 2,2) |
| >2 - 5                                           | 21,9 (14,5 to 32,9)  | 23/13,4 | 1,7 (1,1 to 2,6)  | 31,3 (24,5 to 39,9)  | 65/49,9   | 1,3 (1,0 to 1,7) |
| >5 - 10                                          | 15 (9,7 to 23,2)     | 20/19,6 | 1 (0,7 to 1,6)    | 37 (30,2 to 45,2)    | 95/70,3   | 1,4 (1,1 to 1,7) |
| 10+                                              | 22,8 (16,5 to 31,5)  | 37/31,4 | 1,2 (0,9 to 1,6)  | 43,4 (35,4 to 53,2)  | 92/70,9   | 1,3 (1,1 to 1,6) |
| Primary sclerosing cholangitis <sup>c</sup>      |                      |         |                   |                      |           |                  |
| No                                               | 19,7 (15,9 to 24,3)  | 85/68,1 | 1,2 (1,0 to 1,5)  | 36 (31,9 to 40,6)    | 264/203,8 | 1,3 (1,1 to 1,5) |
| Yes                                              | 59,5 (24,8 to 143,1) | 5/1,1   | 4,7 (2,0 to 11,3) | 65,4 (39,4 to 108,5) | 15/4,8    | 3,1 (1,9 to 5,2) |

Bowel surgery during follow-up<sup>d</sup>

|     |                     |         |                  |                     |           |                  |
|-----|---------------------|---------|------------------|---------------------|-----------|------------------|
| No  | 21,3 (17 to 26,7)   | 75/56,3 | 1,3 (1,1 to 1,7) | 34,5 (30,3 to 39,3) | 228/184,6 | 1,2 (1,1 to 1,4) |
| Yes | 17,1 (10,3 to 28,3) | 15/12,8 | 1,2 (0,7 to 1,9) | 53,3 (40,5 to 70,2) | 51/24,0   | 2,1 (1,6 to 2,8) |

IR, incidence rate, per 100 000 person-years; CI, confidence interval; O, observed number of cases; E, expected number of cases; SIR, standardized incidence ratio.

#All patients were at risk from one year after IBD diagnosis;

<sup>a</sup>Patients diagnosed before 2002 could represent a mix of prevalent and incident patients with IBD, as outpatient data were gradually included in hospital databases and the Swedish national patient register;

<sup>b</sup>Definitions and diagnostic codes were used according to the Montreal classifications using ICD9 and ICD10 in Norwegian data and using ICD-10 in Swedish data, representing maximum disease involvement during follow-up, see Table S2 for details;

<sup>c</sup>Patients with primary sclerosing cholangitis contributed person-time to the non-PSC group until the date of PSC diagnosis;

<sup>d</sup>Bowel surgeries included colectomy, small bowel resection, rectal resection, and colon resection during follow-up. See Table S3 for definitions.

**Table S7: Number of cases, standardized incidence ratio, and crude incidence rates per 100,000 person-years for Hodgkin lymphoma, Norway and Sweden.**

| Parameters                                       | Norway 1987-2015   |         |                   | Sweden 1993-2016   |         |                   |
|--------------------------------------------------|--------------------|---------|-------------------|--------------------|---------|-------------------|
|                                                  | IR (95% CI)        | O/E     | SIR (95% CI)      | IR (95% CI)        | O/E     | SIR (95% CI)      |
| Total                                            | 3,4 (2,1 to 5,6)   | 15/10,6 | 1,4 (0,9 to 2,3)  | 3,8 (2,7 to 5,5)   | 29/17,9 | 1,6 (1,1 to 2,3)  |
| Sex                                              |                    |         |                   |                    |         |                   |
| Female                                           | 3,3 (1,6 to 6,9)   | 7/4     | 1,8 (0,8 to 3,7)  | 2,4 (1,3 to 4,7)   | 9/7,6   | 1,2 (0,6 to 2,3)  |
| Male                                             | 3,5 (1,8 to 7,1)   | 8/6,6   | 1,2 (0,6 to 2,4)  | 5,2 (3,3 to 8,0)   | 20/10,2 | 2 (1,3 to 3,0)    |
| Age at IBD diagnosis                             |                    |         |                   |                    |         |                   |
| <20                                              | 3,8 (1 to 15,3)    | 2/1,7   | 1,2 (0,3 to 4,8)  | 2,4 (0,6 to 9,7)   | 2/2,7   | 0,7 (0,2 to 3)    |
| 20-39                                            | 3 (1,3 to 6,6)     | 6/5,1   | 1,2 (0,5 to 2,6)  | 3,8 (2,1 to 6,9)   | 11/6,6  | 1,7 (0,9 to 3)    |
| 40-59                                            | 3,7 (1,6 to 9)     | 5/2,6   | 1,9 (0,8 to 4,6)  | 2,9 (1,5 to 5,8)   | 8/5,4   | 1,5 (0,7 to 3)    |
| 60+                                              | 3,8 (0,9 to 15,2)  | 2/1,2   | 1,6 (0,4 to 6,6)  | 7,1 (3,6 to 14,3)  | 8/3,2   | 2,5 (1,3 to 5)    |
| Calendar year of IBD diagnosis <sup>a</sup>      |                    |         |                   |                    |         |                   |
| 1987/93-2002                                     | 2,4 (1,2 to 4,9)   | 8/7,7   | 1,0 (0,5 to 2,1)  | 4,1 (2,7 to 6,3)   | 21/11,4 | 1,8 (1,2 to 2,8)  |
| 2003-2015/6                                      | 6,1 (2,9 to 12,9)  | 7/2,9   | 2,4 (1,1 to 5,1)  | 3,2 (1,6 to 6,4)   | 8/6,5   | 1,2 (0,6 to 2,5)  |
| IBD subtype                                      |                    |         |                   |                    |         |                   |
| Ulcerative colitis                               | 3,7 (1,5 to 8,9)   | 5/3,4   | 1,5 (0,6 to 3,6)  | 4,2 (2,3 to 7,5)   | 11/6,1  | 1,8 (1,0 to 3,2)  |
| Crohn's disease                                  | 3,6 (2,0 to 6,8)   | 10/6,5  | 1,5 (0,8 to 2,9)  | 3,8 (2,4 to 6,1)   | 17/10,6 | 1,6 (1,0 to 2,6)  |
| IBD-unclassified                                 | -                  | 0/0,8   | -                 | 2,1 (0,3 to 15,2)  | 1/1,2   | 0,9 (0,1 to 6,2)  |
| Extent of ulcerative colitis <sup>b</sup>        |                    |         |                   |                    |         |                   |
| E1 (proctitis)                                   | 7,1 (3,0 to 17,1)  | 5/1,6   | 3,1 (1,3 to 7,5)  | 4,8 (1,2 to 19,3)  | 2/0,9   | 2,1 (0,5 to 8,4)  |
| E2 (left-sided)                                  | -                  | 0/0,4   | -                 | 4,8 (1,8 to 12,8)  | 4/1,9   | 2,1 (0,8 to 5,5)  |
| E3 (extensive)                                   | 3,3 (1,4 to 7,9)   | 5/3,7   | 1,4 (0,6 to 3,2)  | 3,2 (1,6 to 6,5)   | 8/5,9   | 1,3 (0,7 to 2,7)  |
| Ex (not defined)                                 | -                  | 0/0,8   | -                 | 4,1 (1,3 to 12,7)  | 3/1,7   | 1,7 (0,6 to 5,4)  |
| Location of Crohn's disease <sup>b</sup>         |                    |         |                   |                    |         |                   |
| L1 (terminal ileitis)                            | -                  | 0/0,6   | -                 | 2,3 (0,3 to 16,6)  | 1/1,0   | 1 (0,1 to 7,0)    |
| L2 (colonic)                                     | 3,3 (0,5 to 23,2)  | 1/0,7   | 1,4 (0,2 to 9,7)  | 10,2 (4,3 to 24,6) | 5/1,1   | 4,4 (1,8 to 10,5) |
| L3 (ileocecal)                                   | 6,1 (2,3 to 16,3)  | 4/1,7   | 2,4 (0,9 to 6,3)  | 3,6 (1,5 to 8,5)   | 5/3,3   | 1,5 (0,6 to 3,7)  |
| Lx (not defined)                                 | -                  | 0/0,4   | -                 | -                  | 0/0,7   | -                 |
| Behavior of Crohn's disease <sup>b</sup>         |                    |         |                   |                    |         |                   |
| B1 (non structuring / penetrating)               | 4,1 (1,6 to 11,1)  | 4/2,4   | 1,7 (0,6 to 4,5)  | 4,4 (2,2 to 8,8)   | 8/4,3   | 1,9 (0,9 to 3,7)  |
| B2 (stricturing)                                 | -                  | 0/0,5   | -                 | -                  | 0/1,3   | -                 |
| B3 (penetrating)                                 | 9,3 (1,3 to 65,9)  | 1/0,3   | 3,5 (0,5 to 24,6) | 9,1 (1,3 to 64,9)  | 1/0,3   | 3,7 (0,5 to 26,4) |
| B2B3 (stricturing and penetrating)               | -                  | 0/0,2   | -                 | 16,8 (4,2 to 67,3) | 2/0,3   | 7,8 (1,9 to 31,1) |
| Perianal disease of Crohn's disease <sup>b</sup> |                    |         |                   |                    |         |                   |
| No                                               | 4,5 (1,9 to 10,9)  | 5/2,7   | 1,8 (0,8 to 4,4)  | 2,5 (1,1 to 6,1)   | 5/4,6   | 1,1 (0,5 to 2,6)  |
| Yes                                              | -                  | 0/0,6   | -                 | 9,2 (4,1 to 20,4)  | 6/1,5   | 4 (1,8 to 8,9)    |
| Years since IBD diagnosis                        |                    |         |                   |                    |         |                   |
| >1 - 2                                           | 7,5 (2,4 to 23,3)  | 3/1     | 3 (1,0 to 9,4)    | 1,3 (0,2 to 9)     | 1/1,9   | 0,5 (0,1 to 3,8)  |
| >2 - 5                                           | 1,9 (0,5 to 7,6)   | 2/2,6   | 0,8 (0,2 to 3,1)  | 1,4 (0,5 to 4,5)   | 3/4,9   | 0,6 (0,2 to 1,9)  |
| >5 - 10                                          | 4,5 (2,0 to 10,0)  | 6/3,3   | 1,8 (0,8 to 4,1)  | 5,1 (2,9 to 8,7)   | 13/6,1  | 2,1 (1,2 to 3,7)  |
| 10+                                              | 2,5 (0,9 to 6,6)   | 4/3,7   | 1,1 (0,4 to 2,9)  | 5,7 (3,2 to 10)    | 12/5,0  | 2,4 (1,4 to 4,2)  |
| Primary sclerosing cholangitis <sup>c</sup>      |                    |         |                   |                    |         |                   |
| No                                               | 3 (1,7 to 5,2)     | 13/10,4 | 1,3 (0,7 to 2,2)  | 3,8 (2,6 to 5,5)   | 28/17,3 | 1,6 (1,1 to 2,3)  |
| Yes                                              | 23,8 (6,0 to 95,2) | 2/0,2   | 9,1 (2,3 to 36,3) | 4,6 (0,7 to 32,9)  | 1/0,5   | 1,8 (0,3 to 13,0) |

Bowel surgery during follow-up<sup>d</sup>

|     |                  |        |                  |                   |         |                  |
|-----|------------------|--------|------------------|-------------------|---------|------------------|
| No  | 3,7 (2,1 to 6,3) | 13/8,5 | 1,5 (0,9 to 2,6) | 3,3 (2,2 to 5,1)  | 21/14,9 | 1,4 (0,9 to 2,2) |
| Yes | 2,3 (0,6 to 9,1) | 2/2,2  | 0,9 (0,2 to 3,7) | 8,4 (4,2 to 16,7) | 8/2,3   | 3,5 (1,8 to 7,0) |

IR, incidence rate, per 100 000 person-years; CI, confidence interval; O, observed number of cases; E, expected number of cases; SIR, standardized incidence ratio.

#All patients were at risk from one year after IBD diagnosis;

<sup>a</sup>Patients diagnosed before 2002 could represent a mix of prevalent and incident patients with IBD, as outpatient data were gradually included in hospital databases and the Swedish national patient register;

<sup>b</sup>Definitions and diagnostic codes were used according to the Montreal classifications using ICD9 and ICD10 in Norwegian data and using ICD-10 in Swedish data, representing maximum disease involvement during follow-up, see Table S2 for details;

<sup>c</sup>Patients with primary sclerosing cholangitis contributed person-time to the non-PSC group until the date of PSC diagnosis;

<sup>d</sup>Bowel surgeries included colectomy, small bowel resection, rectal resection, and colon resection during follow-up. See Table S3 for definitions.

**Table S8: Number of cases, standardized incidence ratio, and crude incidence rates per 100,000 person-years for non-Hodgkin lymphoma, Norway and Sweden, first year of follow-up included.**

| Parameters                                       | Norway 1987-2015    |         |                   | Sweden 1993-2016       |           |                   |
|--------------------------------------------------|---------------------|---------|-------------------|------------------------|-----------|-------------------|
|                                                  | IR (95% CI)         | O/E     | SIR (95% CI)      | IR (95% CI)            | O/E       | SIR (95% CI)      |
| Total                                            | 20,1 (16,4 to 24,5) | 97/74   | 1,3 (1,1 to 1,6)  | 41,2 (37,1 to 45,8)    | 346/227,0 | 1,5 (1,4 to 1,7)  |
| Sex                                              |                     |         |                   |                        |           |                   |
| Female                                           | 17 (12,5 to 23,2)   | 40/29   | 1,4 (1 to 1,9)    | 31,2 (26,2 to 37,0)    | 128/89,6  | 1,4 (1,2 to 1,7)  |
| Male                                             | 23 (17,7 to 29,8)   | 57/45   | 1,3 (1 to 1,6)    | 50,9 (44,5 to 58,1)    | 218/137,3 | 1,6 (1,4 to 1,8)  |
| Age at IBD diagnosis                             |                     |         |                   |                        |           |                   |
| <20                                              | 3,5 (0,9 to 14)     | 2/0,6   | 3,5 (0,9 to 13,9) | 10,9 (5,9 to 20,2)     | 10/1,6    | 6,1 (3,3 to 11,4) |
| 20 to 39                                         | 6 (3,5 to 10,2)     | 13/10,5 | 1,2 (0,7 to 2,1)  | 12,9 (9,5 to 17,6)     | 41/19,3   | 2,1 (1,6 to 2,9)  |
| 40-59                                            | 31,2 (23,4 to 41,7) | 46/34,1 | 1,3 (1 to 1,8)    | 46,5 (39,4 to 54,8)    | 140/95,0  | 1,5 (1,2 to 1,7)  |
| 60+                                              | 59,7 (43 to 82,7)   | 36/28,8 | 1,2 (0,9 to 1,7)  | 119,7 (102,3 to 140,1) | 155/111,1 | 1,4 (1,2 to 1,6)  |
| Calendar year of IBD diagnosis <sup>a</sup>      |                     |         |                   |                        |           |                   |
| 1987/93-2002                                     | 19 (14,9 to 24,2)   | 66/53,3 | 1,2 (1 to 1,6)    | 44,0 (38,7 to 49,9)    | 240/155,5 | 1,5 (1,4 to 1,8)  |
| 2003-2015/6                                      | 22,8 (16 to 32,4)   | 31/20,8 | 1,5 (1,1 to 2,1)  | 36,1 (29,8 to 43,7)    | 106/71,5  | 1,5 (1,2 to 1,8)  |
| IBD subtype                                      |                     |         |                   |                        |           |                   |
| Ulcerative colitis                               | 15,6 (10,3 to 23,4) | 23/16,8 | 1,4 (0,9 to 2,1)  | 44,3 (37,3 to 52,7)    | 129/72,9  | 1,8 (1,5 to 2,1)  |
| Crohn's disease                                  | 22,3 (17,6 to 28,4) | 67/52   | 1,3 (1 to 1,6)    | 40,4 (35,2 to 46,4)    | 200/140,7 | 1,4 (1,2 to 1,6)  |
| IBD to unclassified                              | 19,9 (9,5 to 41,6)  | 7/5,2   | 1,3 (0,6 to 2,8)  | 31,8 (19,8 to 51,1)    | 17/13,4   | 1,3 (0,8 to 2,0)  |
| Extent of ulcerative colitis <sup>b</sup>        |                     |         |                   |                        |           |                   |
| E1 (proctitis)                                   | 25 (15,9 to 39,2)   | 19/14,1 | 1,3 (0,9 to 2,1)  | 33,6 (20,6 to 54,9)    | 16/12,0   | 1,3 (0,8 to 2,2)  |
| E2 (left-sided)                                  | 28,7 (12,9 to 63,9) | 6/4,1   | 1,5 (0,7 to 3,3)  | 35,1 (25,0 to 49,4)    | 33/28,8   | 1,1 (0,8 to 1,6)  |
| E3 (extensive)                                   | 20,5 (14,6 to 28,6) | 34/26   | 1,3 (0,9 to 1,8)  | 36,9 (30,3 to 44,9)    | 100/70,0  | 1,4 (1,2 to 1,7)  |
| Ex (not defined)                                 | 21,5 (10,8 to 43)   | 8/7,8   | 1 (0,5 to 2,1)    | 62,0 (47,1 to 81,6)    | 51/30,0   | 1,7 (1,3 to 2,2)  |
| Location of Crohn's disease <sup>b</sup>         |                     |         |                   |                        |           |                   |
| L1 (terminal ileitis)                            | 33,9 (17,6 to 65,2) | 9/3,4   | 2,6 (1,4 to 5)    | 62,0 (43,4 to 88,7)    | 30/14,6   | 2,1 (1,4 to 2,9)  |
| L2 (colonic)                                     | 18 (8,1 to 40)      | 6/4,5   | 1,3 (0,6 to 2,9)  | 42,3 (28,1 to 63,7)    | 23/14,2   | 1,6 (1,1 to 2,4)  |
| L3 (ileocecal)                                   | 9,9 (4,7 to 20,7)   | 7/6,3   | 1,1 (0,5 to 2,3)  | 33,9 (25,9 to 44,5)    | 52/33,6   | 1,5 (1,2 to 2,0)  |
| Lx (not defined)                                 | 5,9 (0,8 to 41,9)   | 1/2,5   | 0,4 (0,1 to 2,8)  | 68,3 (45,8 to 101,9)   | 24/10,5   | 2,3 (1,5 to 3,4)  |
| Behavior of Crohn's disease <sup>b</sup>         |                     |         |                   |                        |           |                   |
| B1 (non structuring / penetrating)               | 17,9 (11,4 to 28)   | 19/12,3 | 1,5 (1 to 2,4)    | 40,9 (33,0 to 50,7)    | 83/48,4   | 1,7 (1,4 to 2,1)  |
| B2 (stricturing)                                 | 8,7 (2,2 to 34,7)   | 2/3,1   | 0,6 (0,2 to 2,6)  | 63,2 (46,3 to 86,1)    | 40/19,5   | 2,1 (1,5 to 2,8)  |
| B3 (penetrating)                                 | 0                   | 0/0,8   | - to 0)           | 41,6 (17,3 to 100,1)   | 5/2,2     | 2,3 (1,0 to 5,5)  |
| B2B3 (stricturing and penetrating)               | 29,7 (7,4 to 118,6) | 2/0,6   | 3,4 (0,9 to 13,6) | 7,8 (1,1 to 55,7)      | 1/2,8     | 0,4 (0,1 to 2,6)  |
| Perianal disease of Crohn's disease <sup>b</sup> |                     |         |                   |                        |           |                   |
| No                                               | 16,5 (10,6 to 25,6) | 20/14,7 | 1,4 (0,9 to 2,1)  | 40,0 (32,5 to 49,3)    | 88/57,3   | 1,5 (1,2 to 1,9)  |
| Yes                                              | 11,3 (3,6 to 35)    | 3/2,1   | 1,5 (0,5 to 4,5)  | 57,6 (42,4 to 78,2)    | 41/15,6   | 2,6 (1,9 to 3,6)  |
| Years since IBD diagnosis                        |                     |         |                   |                        |           |                   |
| 0 - 1                                            | 16,4 (7,8 to 34,4)  | 7/4,9   | 1,4 (0,7 to 3)    | 79,9 (62,9 to 101,5)   | 67/18,3   | 3,7 (2,9 to 4,7)  |

|                                                   |                     |         |                   |                      |           |                  |
|---------------------------------------------------|---------------------|---------|-------------------|----------------------|-----------|------------------|
| >1 - 2                                            | 25,1 (13,5 to 46,6) | 10/4,7  | 2,1 (1,1 to 3,9)  | 34,3 (23,5 to 49,9)  | 27/17,7   | 1,5 (1,0 to 2,2) |
| >2 - 5                                            | 21,9 (14,5 to 32,9) | 23/13,4 | 1,7 (1,1 to 2,6)  | 31,3 (24,5 to 39,9)  | 65/49,9   | 1,3 (1,0 to 1,7) |
| >5 - 10                                           | 15 (9,7 to 23,2)    | 20/19,6 | 1 (0,7 to 1,6)    | 37,0 (30,2 to 45,2)  | 95/70,3   | 1,4 (1,1 to 1,7) |
| 10+                                               | 22,8 (16,5 to 31,5) | 37/31,4 | 1,2 (0,9 to 1,6)  | 43,4 (35,4 to 53,2)  | 92/70,9   | 1,3 (1,1 to 1,6) |
| <b>Primary sclerosing cholangitis<sup>c</sup></b> |                     |         |                   |                      |           |                  |
| No                                                | 19,4 (15,8 to 23,8) | 92/72,9 | 1,3 (1 to 1,5)    | 40,0 (35,9 to 44,6)  | 326/221,9 | 1,5 (1,3 to 1,6) |
| Yes                                               | 56,6 (23,6 to 136)  | 5/1,1   | 4,6 (1,9 to 10,9) | 81,8 (52,8 to 126,8) | 20/5,1    | 3,9 (2,5 to 6,1) |
| <b>Bowel surgery during follow up<sup>d</sup></b> |                     |         |                   |                      |           |                  |
| No                                                | 20,4 (16,4 to 25,4) | 80/60,8 | 1,3 (1,1 to 1,6)  | 38,7 (34,5 to 43,5)  | 287/202,4 | 1,4 (1,3 to 1,6) |
| Yes                                               | 18,7 (11,6 to 30,1) | 17/13,2 | 1,3 (0,8 to 2,1)  | 60,0 (46,5 to 77,5)  | 59/24,6   | 2,4 (1,9 to 3,1) |

IR, incidence rate, per 100 000 person-years; CI, confidence interval; O, observed number of cases; E, expected number of cases; SIR, standardized incidence ratio,

<sup>#</sup>All patients were at risk from one year after IBD diagnosis;

<sup>a</sup>Patients diagnosed before 2002 could represent a mix of prevalent and incident patients with IBD, as outpatient data were gradually included in hospital databases and the Swedish national patient register;

<sup>b</sup>Definitions and diagnostic codes were used according to the Montreal classifications using ICD9 and ICD10 in Norwegian data and using ICD-10 in Swedish data, representing maximum disease involvement during follow-up, see Table S2 for details;

<sup>c</sup>Patients with primary sclerosing cholangitis contributed person-time to the non-PSC group until the date of PSC diagnosis;

<sup>d</sup>Bowel surgeries included colectomy, small bowel resection, rectal resection, and colon resection during follow-up, See Table S3 for definitions,

**Table S9: Number of cases, standardized incidence ratio, and crude incidence rates per 100,000 person-years for Hodgkin lymphoma, Norway and Sweden, first year of follow-up included.**

| Parameters                                       | Norway 1987-2015  |         |                   | Sweden 1993-2016   |         |                   |
|--------------------------------------------------|-------------------|---------|-------------------|--------------------|---------|-------------------|
|                                                  | IR (95% CI)       | O/E     | SIR (95% CI)      | IR (95% CI)        | O/E     | SIR (95% CI)      |
| Total                                            | 3,5 (2,2 to 5,7)  | 17/11,7 | 1,5 (0,9 to 2,3)  | 4,0 (2,9 to 5,7)   | 34/19,8 | 1,7 (1,2 to 2,4)  |
| Sex                                              |                   |         |                   |                    |         |                   |
| Female                                           | 3 (1,4 to 6,2)    | 7/4,4   | 1,6 (0,8 to 3,3)  | 2,7 (1,5 to 4,8)   | 11/8,5  | 1,3 (0,7 to 2,3)  |
| Male                                             | 4 (2,2 to 7,5)    | 10/7,3  | 1,4 (0,7 to 2,6)  | 5,4 (3,6 to 8,1)   | 23/11,3 | 2,0 (1,3 to 3,1)  |
| Age at IBD diagnosis                             |                   |         |                   |                    |         |                   |
| <20                                              | 3,5 (0,9 to 14)   | 2/1,8   | 1,1 (0,3 to 4,5)  | 4,4 (1,6-11,6)     | 4/2,9   | 1,4 (0,5 to 3,7)  |
| 20 to 39                                         | 3,2 (1,5 to 6,7)  | 7/5,7   | 1,2 (0,6 to 2,6)  | 3,8 (2,2 to 6,7)   | 12/7,5  | 1,6 (0,9 to 2,8)  |
| 40-59                                            | 4,1 (1,8 to 9,1)  | 6/2,9   | 2,1 (0,9 to 4,7)  | 2,7 (1,3 to 5,3)   | 8/5,8   | 1,4 (0,7 to 2,7)  |
| 60+                                              | 3,3 (0,8 to 13,3) | 2/1,4   | 1,4 (0,4 to 5,7)  | 7,7 (4,2 to 14,4)  | 10/3,6  | 2,8 (1,5 to 5,1)  |
| Calendar year of IBD diagnosis <sup>a</sup>      |                   |         |                   |                    |         |                   |
| 1987/93-2002                                     | 2,6 (1,3 to 5)    | 9/8,2   | 1,1 (0,6 to 2,1)  | 4,2 (2,8 to 6,3)   | 23/12,2 | 1,9 (1,2 to 2,8)  |
| 2003-2015/6                                      | 5,9 (2,9 to 11,7) | 8/3,5   | 2,3 (1,2 to 4,6)  | 3,7 (2,1 to 6,8)   | 11/7,6  | 1,4 (0,8 to 2,6)  |
| IBD subtype                                      |                   |         |                   |                    |         |                   |
| Ulcerative colitis                               | 3,4 (1,4 to 8,1)  | 5/3,7   | 1,4 (0,6 to 3,3)  | 4,8 (2,8 to 8,1)   | 14/6,8  | 2,1 (1,2 to 3,5)  |
| Crohn's disease                                  | 3,7 (2 to 6,6)    | 11/7,1  | 1,5 (0,9 to 2,8)  | 3,8 (2,4 to 6,0)   | 19/11,7 | 1,6 (1,0 to 2,5)  |
| IBD-unclassified                                 | 2,8 (0,4 to 20,1) | 1/0,9   | 1,2 (0,2 to 8,3)  | 1,9 (0,3 to 13,3)  | 1/1,3   | 0,8 (0,1 to 5,4)  |
| Extent of ulcerative colitis <sup>b</sup>        |                   |         |                   |                    |         |                   |
| E1 (proctitis)                                   | 6,6 (2,7 to 15,8) | 5/1,7   | 2,9 (1,2 to 6,9)  | 4,2 (1,1 to 16,8)  | 2/1,1   | 1,8 (0,5 to 7,3)  |
| E2 (left-sided)                                  | -                 | 0/0,5   | -                 | 5,3 (2,2 to 12,8)  | 5/2,2   | 2,3 (0,9 to 5,5)  |
| E3 (extensive)                                   | 3,6 (1,6 to 8)    | 6/4,1   | 1,5 (0,7 to 3,3)  | 3,0 (1,5 to 5,9)   | 8/6,5   | 1,2 (0,6 to 2,5)  |
| Ex (not defined)                                 | -                 | 0/0,8   | -                 | 4,9 (1,8 to 13,0)  | 4/1,9   | 2,1 (0,8 to 5,5)  |
| Location of Crohn's disease <sup>b</sup>         |                   |         |                   |                    |         |                   |
| L1 (terminal ileitis)                            | -                 | 0/0,7   | -                 | 4,1 (1,0 to 16,5)  | 2/1,1   | 1,7 (0,4 to 7,0)  |
| L2 (colonic)                                     | 3 (0,4 to 21,3)   | 1/0,8   | 1,2 (0,2 to 8,8)  | 11,0 (5,0 to 24,6) | 6/1,3   | 4,7 (2,1 to 10,5) |
| L3 (ileocecal)                                   | 5,6 (2,1 to 15)   | 4/1,8   | 2,2 (0,8 to 5,9)  | 3,9 (1,8 to 8,7)   | 6/3,6   | 1,7 (0,8 to 3,8)  |
| Lx (not defined)                                 | -                 | 0/0,4   | -                 | -                  | 0/0,8   | -                 |
| Behavior of Crohn's disease <sup>b</sup>         |                   |         |                   |                    |         |                   |
| B1 (non structuring / penetrating)               | 3,8 (1,4 to 10)   | 4/2,6   | 1,5 (0,6 to 4)    | 5,4 (3,0-9,8)      | 11/4,8  | 2,3 (1,3-4,1)     |
| B2 (stricturing)                                 | -                 | 0/0,6   | -                 | -                  | 0/1,4   | -                 |
| B3 (penetrating)                                 | 8,6 (1,2 to 60,7) | 1/0,3   | 3,2 (0,4 to 22,6) | 8,3 (1,2 to 59,1)  | 1/0,3   | 3,4 (0,5 to 24,0) |
| B2B3 (stricturing and penetrating)               | -                 | 0/0,2   | -                 | 15,7 (3,9 to 62,8) | 2/0,3   | 7,2 (1,8 to 29,0) |
| Perianal disease of Crohn's disease <sup>b</sup> |                   |         |                   |                    |         |                   |
| No                                               | 4,1 (1,7 to 9,9)  | 5/3     | 1,7 (0,7 to 4)    | 3,6 (1,8 to 7,3)   | 8/5,1   | 1,6 (0,8 to 3,1)  |
| Yes                                              | -                 | 0/0,7   | -                 | 8,4 (3,8 to 18,8)  | 6/1,6   | 3,6 (1,6 to 8,1)  |
| Years since IBD diagnosis                        |                   |         |                   |                    |         |                   |
| 0-1                                              | 4,7 (1,2 to 18,8) | 2/1,1   | 1,9 (0,5 to 7,5)  | 6,0 (2,5 to 14,3)  | 5/2,0   | 2,5 (1,0 to 6,0)  |
| >1 - 2                                           | 7,5 (2,4 to 23,3) | 3/1     | 3 (1 to 9,4)      | 1,3 (0,2 to 9,0)   | 1/1,9   | 0,5 (0,1 to 3,8)  |
| >2 - 5                                           | 1,9 (0,5 to 7,6)  | 2/2,6   | 0,8 (0,2 to 3,1)  | 1,4 (0,5 to 4,5)   | 3/4,9   | 0,6 (0,2 to 1,9)  |
| >5 - 10                                          | 4,5 (2 to 10)     | 6/3,3   | 1,8 (0,8 to 4,1)  | 5,1 (2,9 to 8,7)   | 13/6,1  | 2,1 (1,2 to 3,7)  |
| 10+                                              | 2,5 (0,9 to 6,6)  | 4/3,7   | 1,1 (0,4 to 2,9)  | 5,7 (3,2 to 10,0)  | 12/5,0  | 2,4 (1,4 to 4,2)  |
| Primary sclerosing cholangitis <sup>c</sup>      |                   |         |                   |                    |         |                   |
| No                                               | 3,2 (1,9 to 5,2)  | 15/11,4 | 1,3 (0,8 to 2,2)  | 4,0 (2,9 to 5,7)   | 33/19,2 | 1,7 (1,2 to 2,4)  |



|                                                |     |                    |        |                   |                   |         |                   |
|------------------------------------------------|-----|--------------------|--------|-------------------|-------------------|---------|-------------------|
| Bowel surgery during follow to up <sup>d</sup> | Yes | 22,6 (5,7 to 90,5) | 2/0,2  | 8,7 (2,2 to 34,6) | 4,1 (0,6 to 29,0) | 1/0,6   | 1,6 (0,2 to 11,5) |
|                                                | No  | 3,6 (2,1 to 6)     | 14/9,4 | 1,5 (0,9 to 2,5)  | 3,5 (2,4 to 5,2)  | 26/17,5 | 1,5 (1,0 to 2,2)  |
|                                                | Yes | 3,3 (1,1 to 10,2)  | 3/2,2  | 1,3 (0,4 to 4,2)  | 8,1 (4,1 to 16,3) | 8/2,3   | 3,4 (1,7 to 6,8)  |

IR, incidence rate, per 100 000 person-years; CI, confidence interval; O, observed number of cases; E, expected number of cases; SIR, standardized incidence ratio,

#All patients were at risk from one year after IBD diagnosis;

<sup>a</sup>Patients diagnosed before 2002 could represent a mix of prevalent and incident patients with IBD, as outpatient data were gradually included in hospital databases and the Swedish national patient register;

<sup>b</sup>Definitions and diagnostic codes were used according to the Montreal classifications using ICD9 and ICD10 in Norwegian data and using ICD-10 in Swedish data, representing maximum disease involvement during follow-up, see Table S2 for details;

<sup>c</sup>Patients with primary sclerosing cholangitis contributed person-time to the non-PSC group until the date of PSC diagnosis;

<sup>d</sup>Bowel surgeries included colectomy, small bowel resection, rectal resection, and colon resection during follow-up. See Table S3 for definitions,

**References**

1. Schneeweiss S, Rassen JA, Brown JS, et al. Graphical Depiction of Longitudinal Study Designs in Health Care Databases. *Ann Intern Med* 2019;170(6):398-406. DOI: 10.7326/M18-3079.
2. Olen O, Askling J, Sachs MC, et al. Mortality in adult-onset and elderly-onset IBD: a nationwide register-based cohort study 1964-2014. *Gut* 2020;69(3):453-461. DOI: 10.1136/gutjnl-2018-317572.
3. Swerdlow SH, Campo E, Pileri SA, et al. The 2016 revision of the World Health Organization classification of lymphoid neoplasms. *Blood* 2016;127(20):2375-90. DOI: 10.1182/blood-2016-01-643569.
4. Fritz AG. International classification of diseases for oncology : ICD-O. Third edition, First revision. ed. Geneva: World Health Organization, 2013.
